# Supplementary material for: Electrospun Fibers of Polybutylene Succinate/Graphene Oxide Composite for Syringe-Push Protein Absorption Membrane
Source: MDPI journal article supplement (doi:10.3390/polym13132042), 2021-06-22

# Supplementary Materials

## Electrospun Fibers of Polybutylene Succinate/Graphene Oxide Composite for Syringe-push Protein Absorption Membrane

Nuankanya Sathirapongsasuti <sup>1,2</sup>, Anuchan Panaksri <sup>2,3</sup>, Sani Boonyagul <sup>3</sup>, Somchai Chutipongtanate <sup>4</sup>  
and Nuttapol Tanadchangsang <sup>3,\*</sup>

<sup>1</sup> Section of Translational Medicine, Faculty of Medicine Ramathibodi Hospital, Mahidol University, 270 Thanon Rama VI, Thung Phaya Thai, Ratchathewi, Bangkok 10400 Thailand; nuankanya.sat@mahidol.ac.th (N.S.)

<sup>2</sup> Research Network of NANOTEC - MU Ramathibodi on Nanomedicine, Bangkok, Thailand; nuankanya.sat@mahidol.ac.th (N.S.); anuchan.p59@rsu.ac.th (A.P.)

<sup>3</sup> College of Biomedical Engineering, Rangsit University, 52/347 Phahonyothin Road, Lak-Hok, Pathumthani 12000 Thailand; anuchan.p59@rsu.ac.th (A.P.); sani@rsu.ac.th (S.B.); nuttapol.t@rsu.ac.th (N.T.)

<sup>4</sup> Department of Pediatrics, Faculty of Medicine Ramathibodi Hospital, Mahidol University, 270 Thanon Rama VI, Thung Phaya Thai, Ratchathewi, Bangkok 10400 Thailand; schuti.rama@gmail.com (S.C.)

\* Correspondence: nuttapol.t@rsu.ac.th; Tel.: +66-(0)2-997-2200 ext. 1428, Fax: +66-(0)2-997-2200 ext. 1408

**Figure S1 Calibration curve of Protein vs. OD**

| Protein concentration (mg/ml) | OD. 595 nm (Abs.) |
|-------------------------------|-------------------|
| 0.2                           | 1.137             |
| 0.4                           | 1.468             |
| 0.6                           | 1.658             |
| 0.8                           | 1.802             |
| 1                             | 2.005             |

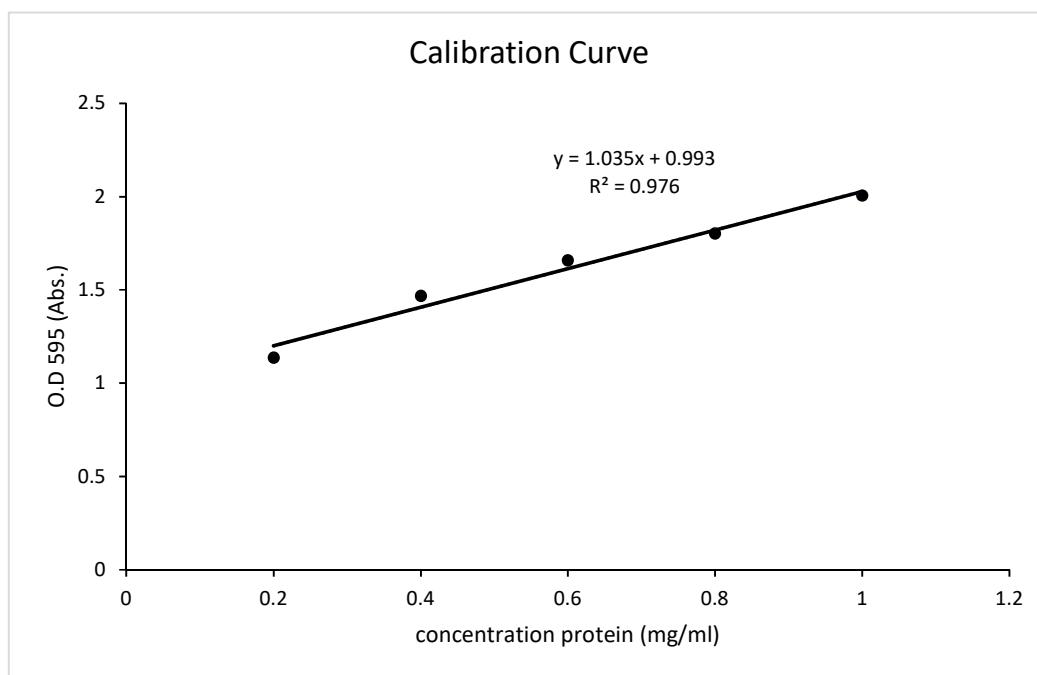

Figure S2 Color intensities of the staining membranes.

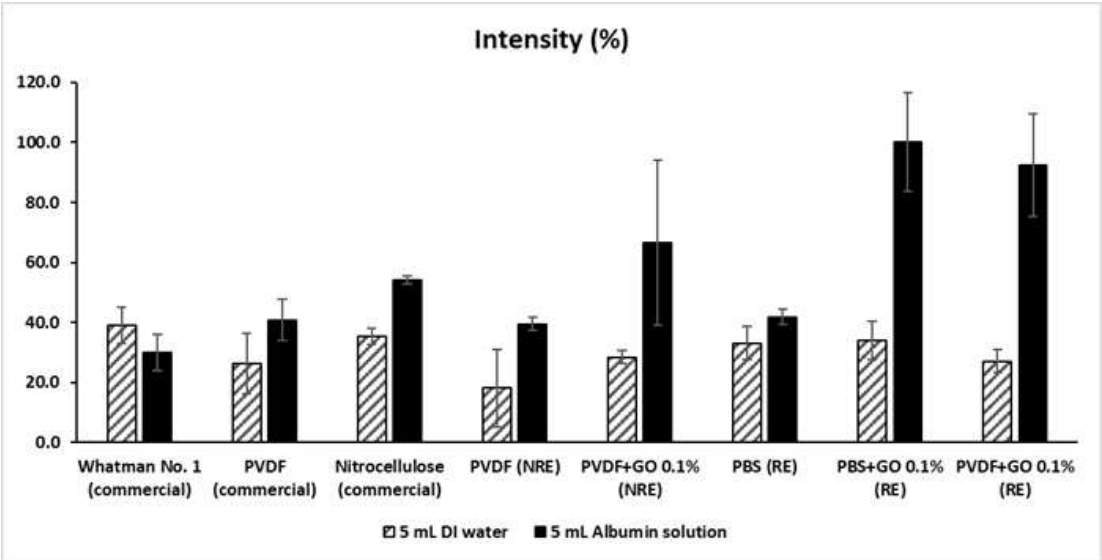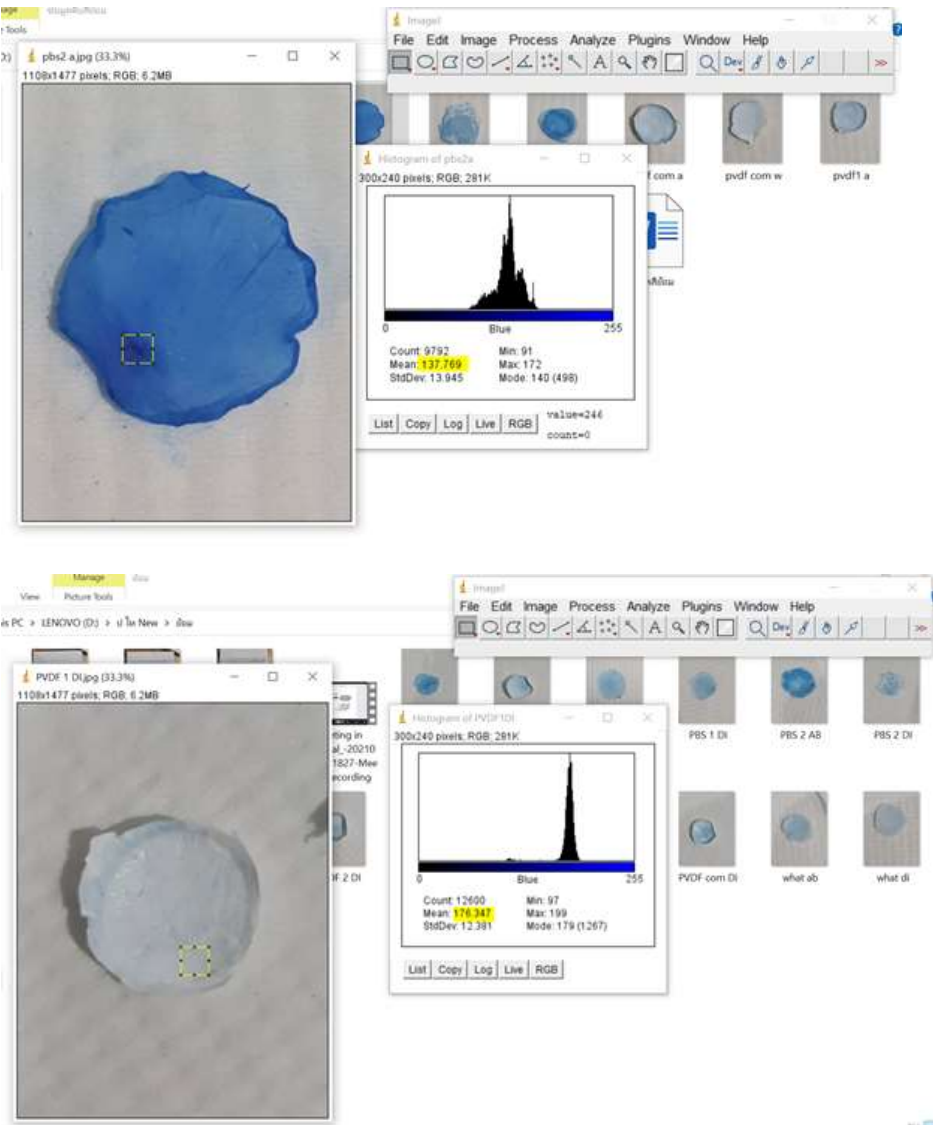

Supplement: s1 [file s1]
